# Supplementary material for: Transcriptome Analysis and Expression of Selected Cationic Amino Acid Transporters in the Liver of Broiler Chicken Fed Diets with Varying Concentrations of Lysine
Source: PubMed Central journal article supplement (PMC7460557; doi:10.3390/ijms21165594), 2020-08-05
Supplement: ijms-21-05594-s001.pdf [file ijms-21-05594-s001.pdf]

**Table S1.** Significantly enriched lysine related biological processes with GO terms involved in lysine metabolism, lysine transport and lysine modifications.

| GO term | Description                                       | Detected Genes | Detected Genes (Names)                                                                                                                                                                                   |
|---------|---------------------------------------------------|----------------|----------------------------------------------------------------------------------------------------------------------------------------------------------------------------------------------------------|
| 0006553 | Lysine metabolic process                          | 2              | AASDHPPT, AASS                                                                                                                                                                                           |
| 0006554 | Lysine catabolic process                          | 1              | AASS                                                                                                                                                                                                     |
| 0008612 | Peptidyl-lysine modification to Peptidyl-hypusine | 1              | DOHH                                                                                                                                                                                                     |
| 0009085 | Lysine biosynthetic process                       | 2              | AASDHPPT, AASS                                                                                                                                                                                           |
| 0009086 | Methionine biosynthetic process                   | 5              | APIP, ENOPH1, MTAP, MTHFR, MTRR                                                                                                                                                                          |
| 0015819 | Lysine transport                                  | 1              | PQLC2                                                                                                                                                                                                    |
| 0017185 | Peptidyl-lysine hydroxylation                     | 2              | JMJD6, PLOD1                                                                                                                                                                                             |
| 0018022 | Peptidyl-lysine methylation                       | 11             | ASH2L, DPY30, EEF1AKMT1, SETD3, SETD4, SETD6, SMYD2, SUV39H2, WDR5, WDR61, WDR82                                                                                                                         |
| 0018023 | Peptidyl-lysine trimethylation                    | 4              | SETD3, SETD4, WDR61, WDR82                                                                                                                                                                               |
| 0018026 | Peptidyl-lysine monomethylation                   | 4              | SETD3, SETD4, SETD6, SMYD2                                                                                                                                                                               |
| 0018027 | Peptidyl-lysine dimethylation                     | 2              | SETD3, SMYD2                                                                                                                                                                                             |
| 0018057 | Peptidyl-lysine oxidation                         | 2              | LOXL2, LOXL4                                                                                                                                                                                             |
| 0018205 | Peptidyl-lysine modification                      | 51             | ACTL6A, ACTL6B, ASH2L, DOHH, DPY30, EEF1AKMT1, ING3, JMJD6, KANSL2, KANSL3, KAT14, KAT6A, KAT6B, KAT7, LOXL2, LOXL4, MEAF6, MORF4L1, MRGBP, MSL2, MSL3, NAA50, PHF20, PLOD1, RUVBL2, SAE1, SENP1, SENP2, |

|         |                                                     |    |                                                                                                                                                                    |
|---------|-----------------------------------------------------|----|--------------------------------------------------------------------------------------------------------------------------------------------------------------------|
|         |                                                     |    | SENP5, SENP6, SENP7, SETD3, SETD4, SETD6, SGF29, SIRT5, SMYD2, SUMO1, SUMO2, SUMO3, SUPT7L, SUV39H2, TADA1, TADA3, TAF12, TRIM1BL, UBA2, UBE2I, WDR5, WDR61, WDR82 |
| 0018393 | Internal peptidyl-lysine acetylation                | 22 | ACTL6A, ACTL6B, ING3, KANSL2, KANSL3, KAT14, KAT6A, KAT6B, KAT7, MEAF6, MORF4L1, MRGBP, MSL2, MSL3, NAA50, PHF20, RUVBL2, SGF29, SUPT7L, TADA1, TADA3, TAF12       |
| 0018394 | Peptidyl-lysine acetylation                         | 22 | ACTL6A, ACTL6B, ING3, KANSL2, KANSL3, KAT14, KAT6A, KAT6B, KAT7, MEAF6, MORF4L1, MRGBP, MSL2, MSL3, NAA50, PHF20, RUVBL2, SGF29, SUPT7L, TADA1, TADA3, TAF12       |
| 0018395 | Peptidyl-lysine hydroxylation to 5-hydroxy-L-lysine | 1  | JMJD6                                                                                                                                                              |
| 0019477 | L-lysine catabolic process                          | 1  | AASS                                                                                                                                                               |
| 0019878 | Lysine biosynthetic process via aminoadipic acid    | 2  | AASDHPPT, AASS                                                                                                                                                     |
| 0034968 | Histone lysine methylation                          | 7  | ASH2L, DPY30, SETD3, SUV39H2, WDR5, WDR61, WDR82                                                                                                                   |
| 0036047 | Peptidyl-lysine demalonylation                      | 1  | SIRT5                                                                                                                                                              |
| 0036049 | Peptidyl-lysine desuccinylation                     | 1  | SIRT5                                                                                                                                                              |
| 0046440 | L-lysine metabolic process                          | 1  | AASS                                                                                                                                                               |
| 0046485 | Ether lipid metabolic process                       | 4  | DHRS7B, FAR1, PDCD2, TMEM86A                                                                                                                                       |



|             |      |      |      |      |      |      |
|-------------|------|------|------|------|------|------|
| L-Val,%     | 0.00 | 0.00 | 0.00 | 0.02 | 0.02 | 0.00 |
| L-Lys HCL,% | 0.06 | 0.00 | 0.36 | 0.00 | 0.04 | 0.09 |

Calculated levels

|                                     |       |       |       |       |       |       |
|-------------------------------------|-------|-------|-------|-------|-------|-------|
| Metabolizable Energy (Kcal/kg diet) | 3,100 | 3,100 | 3,100 | 3,200 | 3,200 | 3,200 |
| Crude Protein                       | 23    | 23    | 23    | 22    | 22    | 22    |
| L-Lys                               | 0.85  | 1.14  | 1.42  | 0.75  | 1.00  | 1.08  |

Analyzed levels

|             |       |       |       |       |       |       |
|-------------|-------|-------|-------|-------|-------|-------|
| ME, Kcal/kg | 3,100 | 3,100 | 3,100 | 3,200 | 3,200 | 3,200 |
| CP, %       | 23    | 23    | 23    | 22    | 22    | 22    |

<sup>1</sup> Provided per kg of diet: retinyl acetate,3, 500 IU; cholecalciferol,1,000 ICU; DL- $\alpha$ -tocopheryl acetate,4.5 IU; menadione sodium bisulfite complex, 2.8 mg; vitamin B<sub>12</sub>, 5.0 mg;riboflavin,2.5 mg; pantothenic acid,4.0 mg;niacin,15.0 mg;choline,172 mg; folic acid, 230 mg; ethoxyquin, 56.7 mg; manganese, 65 mg; iodine,1 mg; iron, 54.8 mg; copper, 6 mg; zinc,55 mg; selenium, 0.3 mg.

<sup>2</sup> Degussa Corporation, Kennesaw, GA.

**Table S3.** Sequences of primers used in the amplification of CAT-1, CAT-2, CAT-3 and  $\beta$ -actin mRNA of chicken broiler fed diets containing varying concentrations of lysine from hatch to 8 weeks of age.

| Gene name and Reference                                | Primer Sequence <sup>1</sup>         | Amplicons length (bp) | Product length (bp) | Tm <sup>2</sup> (°C) |
|--------------------------------------------------------|--------------------------------------|-----------------------|---------------------|----------------------|
| CAT-1<br>(Humphrey et al., 2006)                       | Forward: 5'-ATGTAGGTTGGGATGGAGCC     | 20                    | 280                 | 62.4                 |
|                                                        | Reverse: 3'-AACGAGTAAGCCAGGAGGGT     | 20                    | 280                 | 62.4                 |
| CAT-2<br>(Humphrey et al., 2006)                       | Forward: 5'-GTTTCCTTCCTCATTGCTGC     | 20                    | 200                 | 60.4                 |
|                                                        | Reverse: 3'-CCACTCCAGGCTCTTGCTAC     | 20                    | 200                 | 64.5                 |
| CAT-3<br>(Humphrey et al., 2006)                       | Forward: 5'-CAAGACTGGCTCTGCCTACC     | 20                    | 236                 | 64.5                 |
|                                                        | Reverse: 3'-GGATCAACGCAAAGAAGTCC     | 20                    | 236                 | 60.4                 |
| $\beta$ -actin <sup>3</sup><br>(Humphrey et al., 2006) | Forward: 5'-CTGACACCACACTTTCTACAATG  | 24                    | 350                 | 61.0                 |
|                                                        | Reverse: 3'-GATCTTCATGAGGTAGTCCGTCAG | 23                    | 350                 | 64.6                 |

<sup>1</sup> Chicken primers for CAT-1, CAT-2 and CAT-3 genes.

<sup>2</sup> Tm represents the optimized primer annealing temperature.

<sup>3</sup> The  $\beta$ -actin was used as internal controls.

Abbreviations: bp, base pairs; CAT, cationic amino acid transporter.
